# Supplementary material
Source: Springer Nature journal article supplement (https://www.springermedizin.de/resource/supplementary/13027_2012_411_MOESM1_ESM.pdf/25656942)

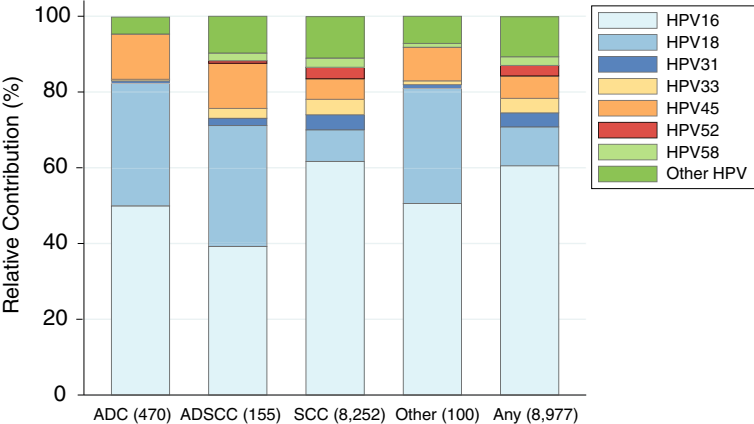

Supplement: MOESM1 [file 25656942]
